# Supplementary material for: Influence of observation temperature on light scattering of poly-N-isopropylacrylamide hydrogels
Source: Royal Society of Chemistry journal article supplement (doi:10.1039/c2sm07316a), 2012-01-01
Supplement: c2sm07316a.pdf [file c2sm07316a.pdf]

Supporting information:

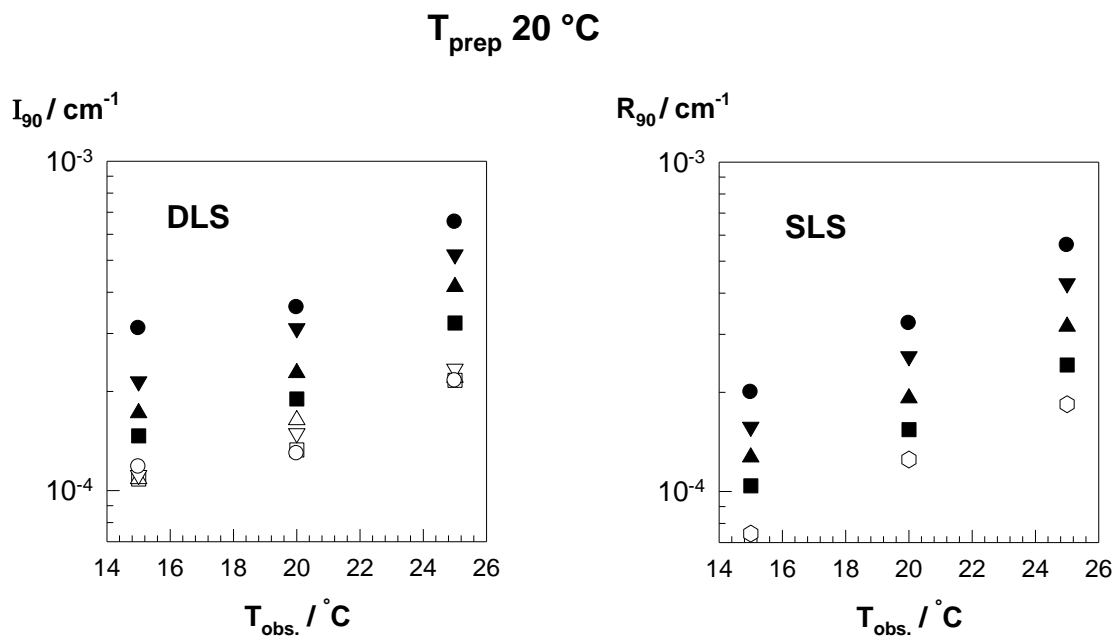

**Figure S1.** Comparison of the scattering intensities measured at  $90^{\circ}$  by DLS ( $I_{90}$ ) and SLS ( $R_{90}$ ) as a function of observation temperature for gels prepared at  $20^{\circ}\text{C}$ . MBA concentrations are: (●) 8.8, (▼) 7.04, (▲) 4.69, and (■) 2.81 mM. Open symbols represent the fluctuating components for DLS or the solution scattering for SLS.

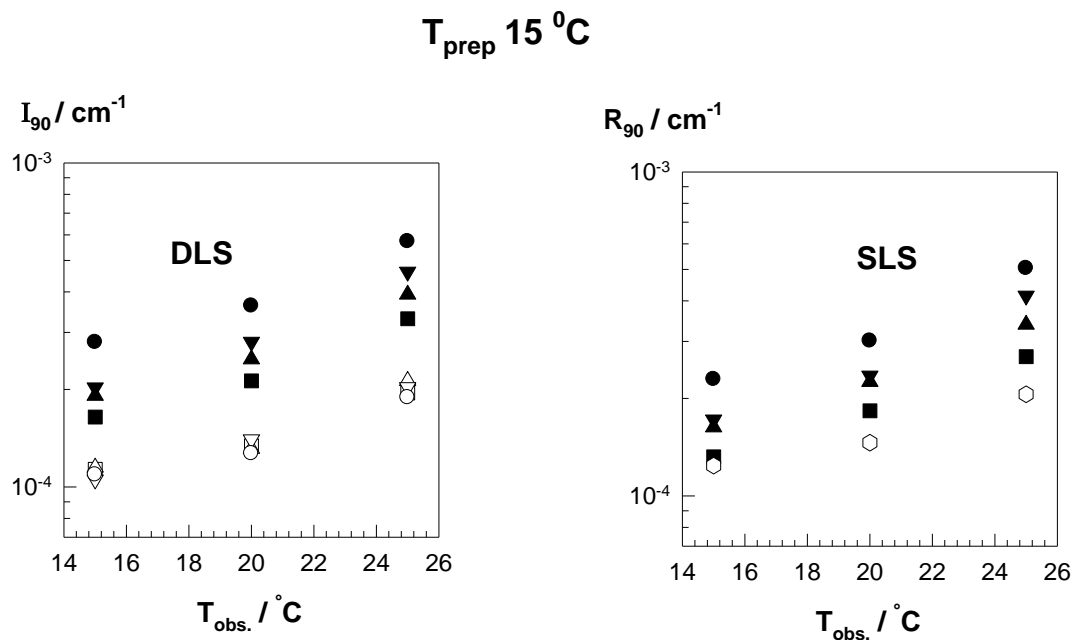

**Figure S2.** Comparison of the scattering intensities measured at  $90^{\circ}$  by DLS ( $I_{90}$ ) and SLS ( $R_{90}$ ) as a function of observation temperature for gels prepared at  $15^{\circ}\text{C}$ . MBA concentrations are: (●) 8.8, (▼) 7.04, (▲) 4.69, and (■) 2.81 mM. Open symbols represent the fluctuating components for DLS or the solution scattering for SLS.
